# Supplementary material
Source: PubMed Central journal article supplement (PMC4938731)
Supplement: NIHMS785659-supplement-1.pdf [file NIHMS785659-supplement-1.pdf]

## Supplementary Information Titles

**Journal:** Nature Medicine

|                              |                                                                                                                                                                    |
|------------------------------|--------------------------------------------------------------------------------------------------------------------------------------------------------------------|
| <b>Article Title:</b>        | Combination inhibition of PI3K and mTORC1 yields durable remissions in orthotopic patient-derived xenografts of HER2-positive breast cancer brain metastases       |
| <b>Corresponding Author:</b> | J.J.Z. (jean_zhao@dfci.harvard.edu),<br>K.L.L. (keith_ligon@dfci.harvard.edu),<br>N.U.L. (nancy_lin@dfci.harvard.edu),<br>or E.P.W. (eric_winer@dfci.harvard.edu). |

| Supplementary Item & Number | Title or Caption                                                                                                 |
|-----------------------------|------------------------------------------------------------------------------------------------------------------|
| Supplementary Figure 1      | Kaplan-Meier survival of mice bearing DF-BM354 and DF-BM355 primary grafts (P0)                                  |
| Supplementary Figure 2      | Selective response of HER2-positive BCBM PDX DF-BM355 to the combination of BKM120/RAD001                        |
| Supplementary Figure 3      | The combination of BKM120/MEK162 has little effect on DF-BM354 tumor growth                                      |
| Supplementary Figure 4      | The combination of BKM120/JQ1 has little effect on DF-BM355 tumor growth                                         |
| Supplementary Figure 5      | Differential responses of HER2-positive BCBM PDXs to the combination of BKM120/RAD001                            |
| Supplementary Figure 6      | Genome-wide DNA CNVs in HER2-positive BCBM PDXs analyzed by WES                                                  |
| Supplementary Figure 7      | Conservation of genetic alternations after the transfer of tissue from patient to mouse                          |
| Supplementary Table 1       | Summary of histological and immunophenotypic analysis of five HER2-positive BCBM PDX models                      |
| Supplementary Table 2       | The treatment histories of HER2-positive BCBM patients who contributed their specimens to the derivation of PDXs |
| Supplementary Table 3       | A list of mutations in DNA repair genes found in DF-BM507 and DF-BM590                                           |
| Supplementary Table 4       | A list of mutations in DNA repair genes found in patient brain metastatic tumors of DF-BM507 and DF-BM590        |
| Supplementary methods       |                                                                                                                  |

## Supplemental Figures

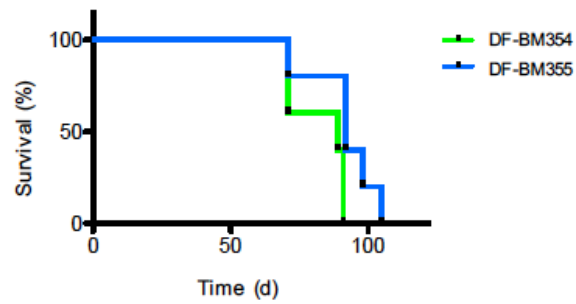

**Supplementary Figure 1: Kaplan-Meier survival of mice bearing DF-BM354 and DF-BM355 primary grafts (P0).** Fresh human HER2-positive breast cancer brain metastases DF-BM354 and DF-BM355 were dissociated and intracranially injected into female SCID mice ( $n = 5$  mice per group).

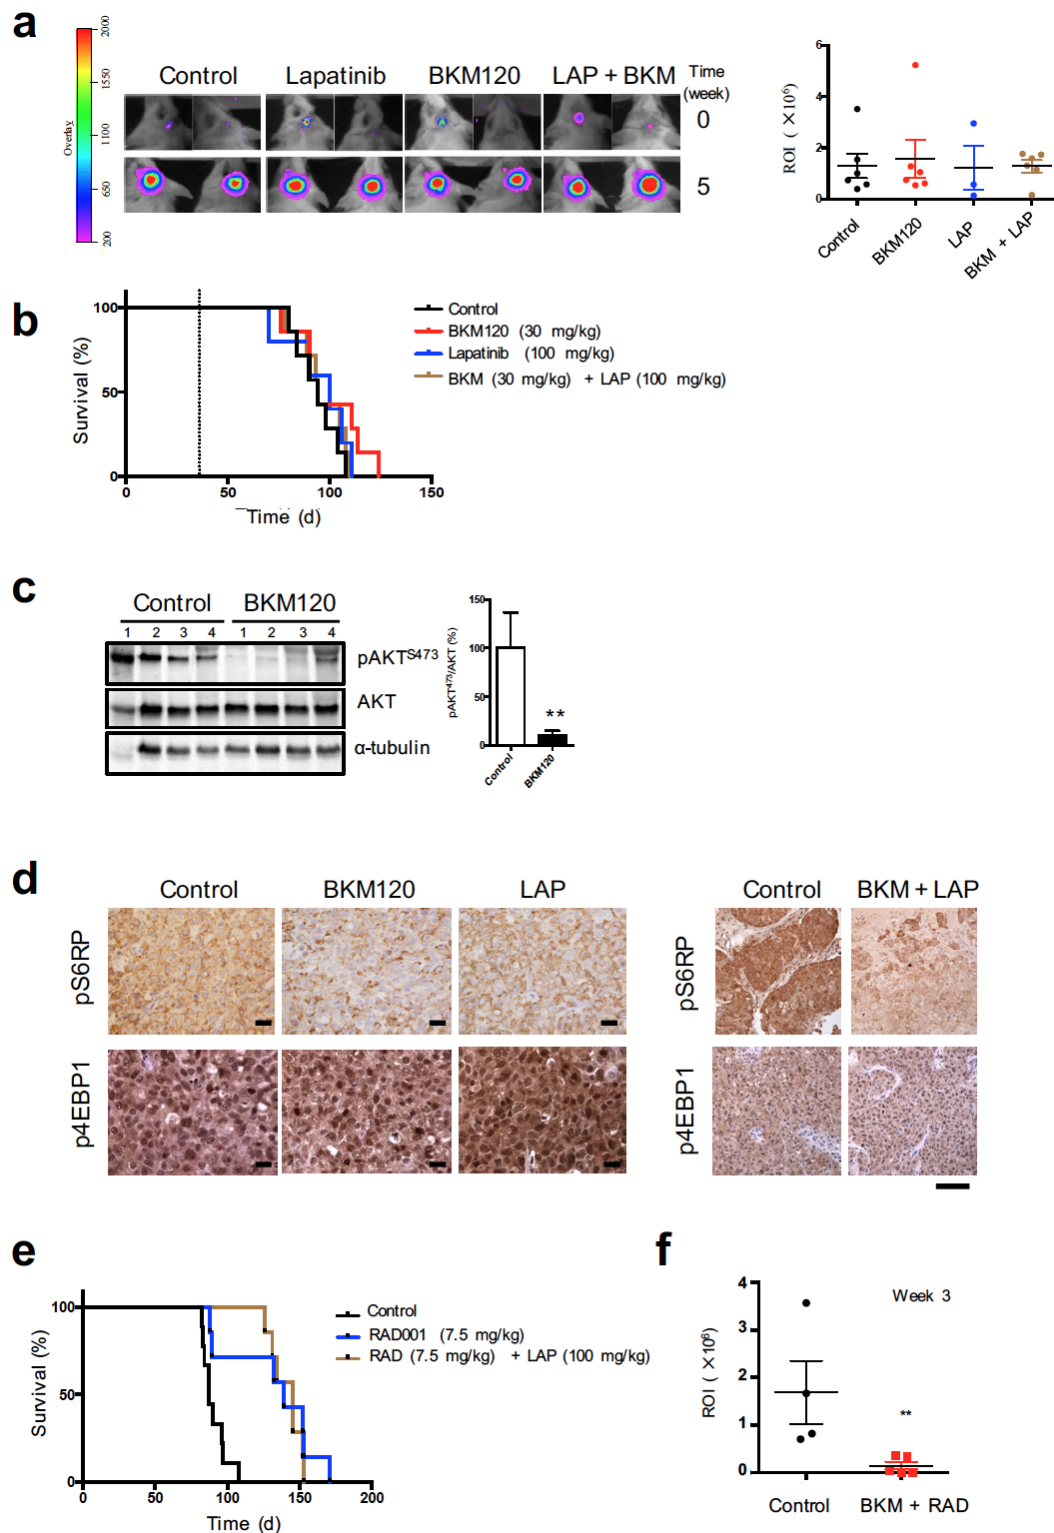

**Supplementary Figure 2: Selective response of HER2-positive PDX DF-BM355 to the combination of BKM120/RAD001.** (a) Left, representative bioluminescence imaging analysis

of mice bearing DF-BM355 tumors at week 0 and week 5 after treatment with vehicle control ( $n = 6$ ), Lapatinib ( $n = 3$ ), BKM120 ( $n = 6$ ), or combined Lapatinib with BKM120 ( $n = 6$ ). Right, quantification of bioluminescence for the brain region of interest (ROI) for the indicated treatment. mean  $\pm$  s.d.,  $n = 3$ –6 female SCID mice per group. **(b)** Kaplan-Meier survival of mice bearing DF-BM355 treated with vehicle control (black,  $n = 7$ ), BKM120 (red, PO, 30 mg/kg, QD,  $n = 7$ ), Lapatinib (blue, PO, 100 mg/kg,  $n = 5$ ), BKM120 + Lapatinib (BKM + LAP, brown,  $n = 7$ ). **(c)** Western blot analysis of lysates from vehicle-treated or BKM120-treated DF-BM355 *in vivo*. Bar graph represents mean  $\pm$  s.d. of western blot quantification of pAKT<sup>S473</sup>/AKT ( $n = 4$ ,  $**P < 0.01$ , Student's *t*-test). **(d)** IHC analyses of pS6RP and p4EBP on DF-BM355 tumors with vehicle, BKM120 (PO 30 mg/kg, QD), LAP (PO 100 mg/kg, QD) or BKM120 + LAP. Scale bars = 25  $\mu$ m (left) and 100  $\mu$ m (right). **(e)** Kaplan-Meier survival of mice bearing DF-BM355 treated with vehicle control (black,  $n = 9$ ), RAD001 (blue, PO 7.5 mg/kg, QD,  $n = 7$ ), or Lapatinib + RAD001 (brown,  $n = 9$ ). **(f)** Quantification of bioluminescence for the brain region of interest (ROI) for the indicated treatment. mean  $\pm$  s.d.,  $n = 4$ –5 female SCID mice per group,  $**P < 0.01$ .

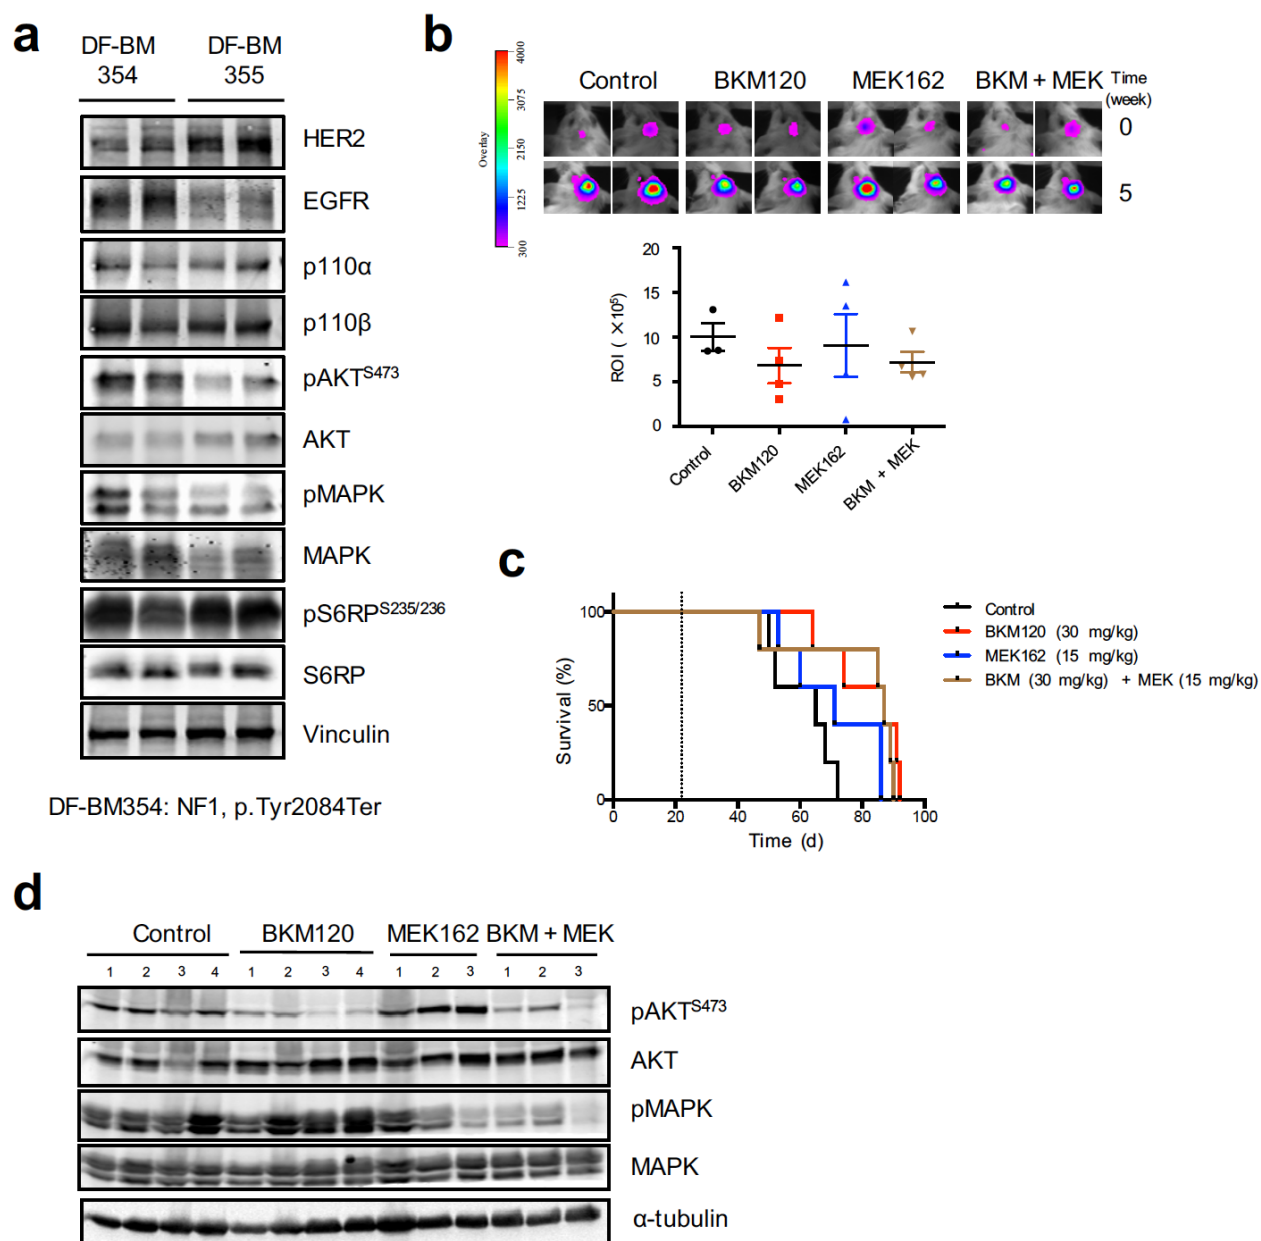

**Supplementary Figure 3: The combination of BKM120/MEK162 has little effect on DF-BM354 tumor growth.** (a) Western blot analysis of PI3K/mTOR/MAPK signaling in DF-BM354 compared to DF-BM355. (b) Top, representative bioluminescence imaging analysis of DF-BM354 before (week 0) and after (week 5) treatment with indicated compounds.  $n = 3-4$ . Bottom, quantification of bioluminescence for the brain region of interest (ROI) for the indicated

treatment. (c) Kaplan-Meier survival of mice treated with BKM120 (red, PO, 30 mg/kg, QD), MEK162 (blue, PO, 15 mg/kg), BKM120 + MEK162 (brown), or vehicle control (black).  $n = 5$ . (d) Western blot analysis of lysates from DF-BM354 tumors treated with vehicle, BKM120, MEK162, or BKM120/MEK162 *in vivo*.

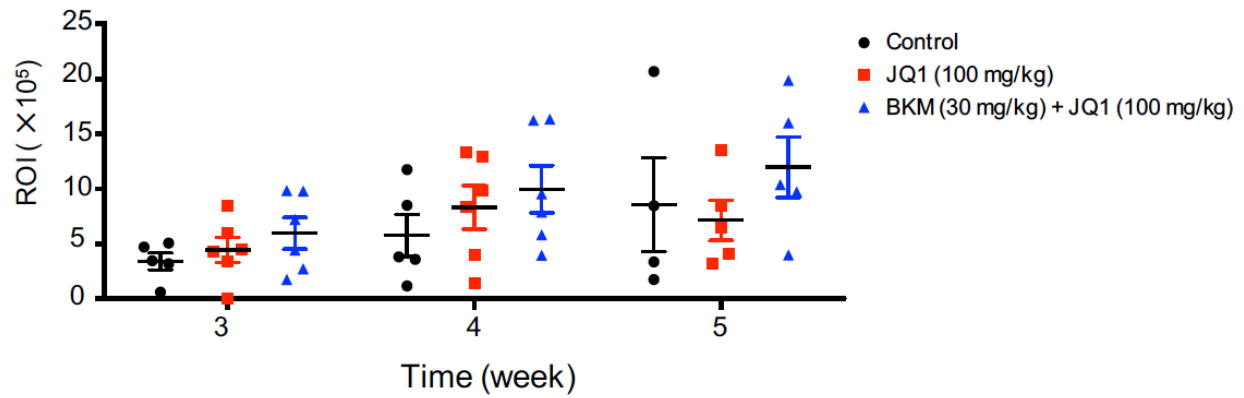

**Supplementary Figure 4: The combination of BKM120/JQ1 has little effect on DF-BM355 tumor growth.** Mice bearing DF-BM355 tumors were treated with JQ1 (red, IP, 100 mg/kg, QD), JQ1 + BKM120 (blue), or vehicle control (black). The tumor burden is represented by quantification of bioluminescence induction for the brain region of interest (ROI).  $n = 5-6$ .

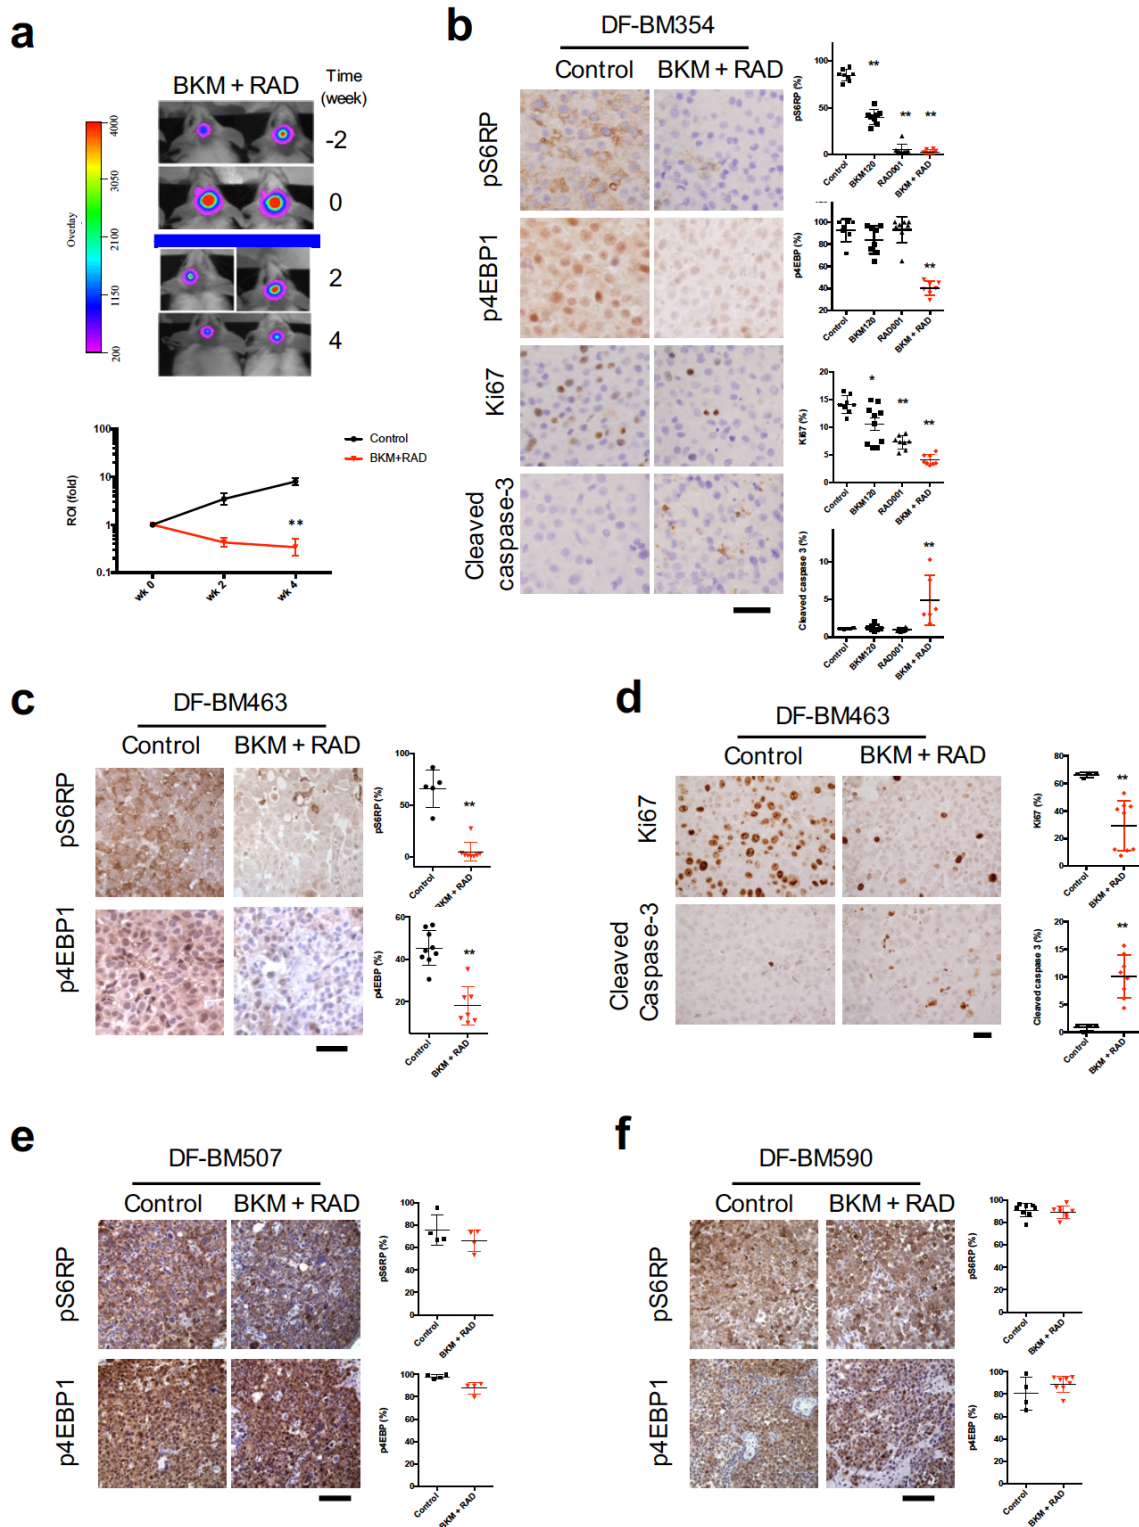

**Supplementary Figure 5: Differential responses of HER2-positive BCBM PDXs to the combination of BKM120/RAD001. (a)** Representative bioluminescence imaging analysis of

DF-BM354 before (wk -2 and wk 0) and after (wk 2 and wk 4) treatment with combined BKM120 and RAD001 (BKM120, PO 30 mg/kg, QD; RAD001, PO 7.5mg/kg, QD) (top) and quantification of bioluminescence for the brain region of interest (ROI) for the indicated treatment (bottom). (mean  $\pm$  s.d.,  $n = 3-5$ ,  $**P < 0.01$ , Student's  $t$ -test). **(b)** IHC analyses of DF-BM354 tumors harvested from tumor bearing mice treated for 4 days with vehicle or BKM120 + RAD001 with indicated antibodies (scale bars = 25  $\mu$ m). Graphs represent mean  $\pm$  s.d. ( $*P < 0.05$ ,  $**P < 0.01$ , one-way ANOVA followed by Dunnett's test). **(c, d)** IHC analyses of DF-BM463 tumors harvested from tumor bearing mice treated for 4 days with vehicle or BKM120 + RAD001 with indicated antibodies (**(c)**, scale bar = 50  $\mu$ m; **(d)**, scale bar = 25  $\mu$ m). Graphs represent mean  $\pm$  s.d. ( $**P < 0.01$ , Student's  $t$ -test). **(e)** IHC analyses of DF-BM507 tumors harvested from tumor bearing mice treated 4 days with vehicle or BKM120 + RAD001 with indicated antibodies (scale bars = 100  $\mu$ m). Graphs represent mean  $\pm$  s.d.. **(f)** IHC analyses of DF-BM590 tumors treated with vehicle or BKM120 + RAD001 with indicated antibodies (scale bars = 100  $\mu$ m). Graphs represent mean  $\pm$  s.d..

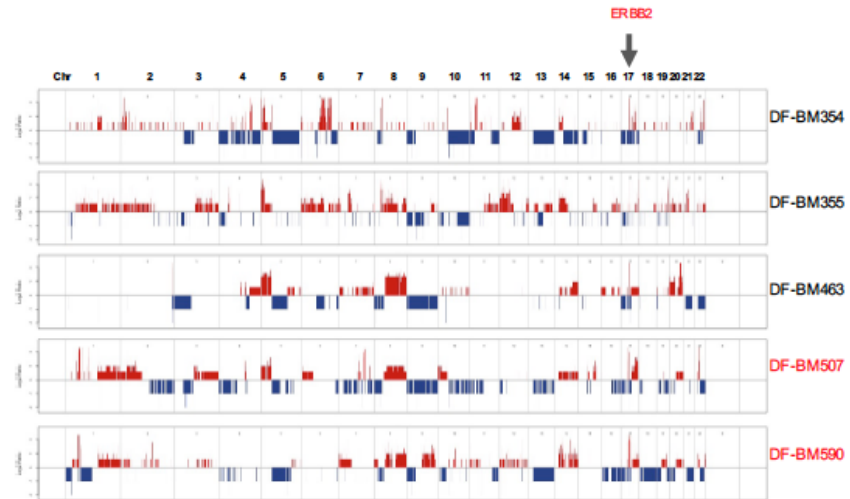

**Supplementary Figure 6: Genome-wide DNA CNVs in HER2-positive BCBM PDXs analyzed by WES.**

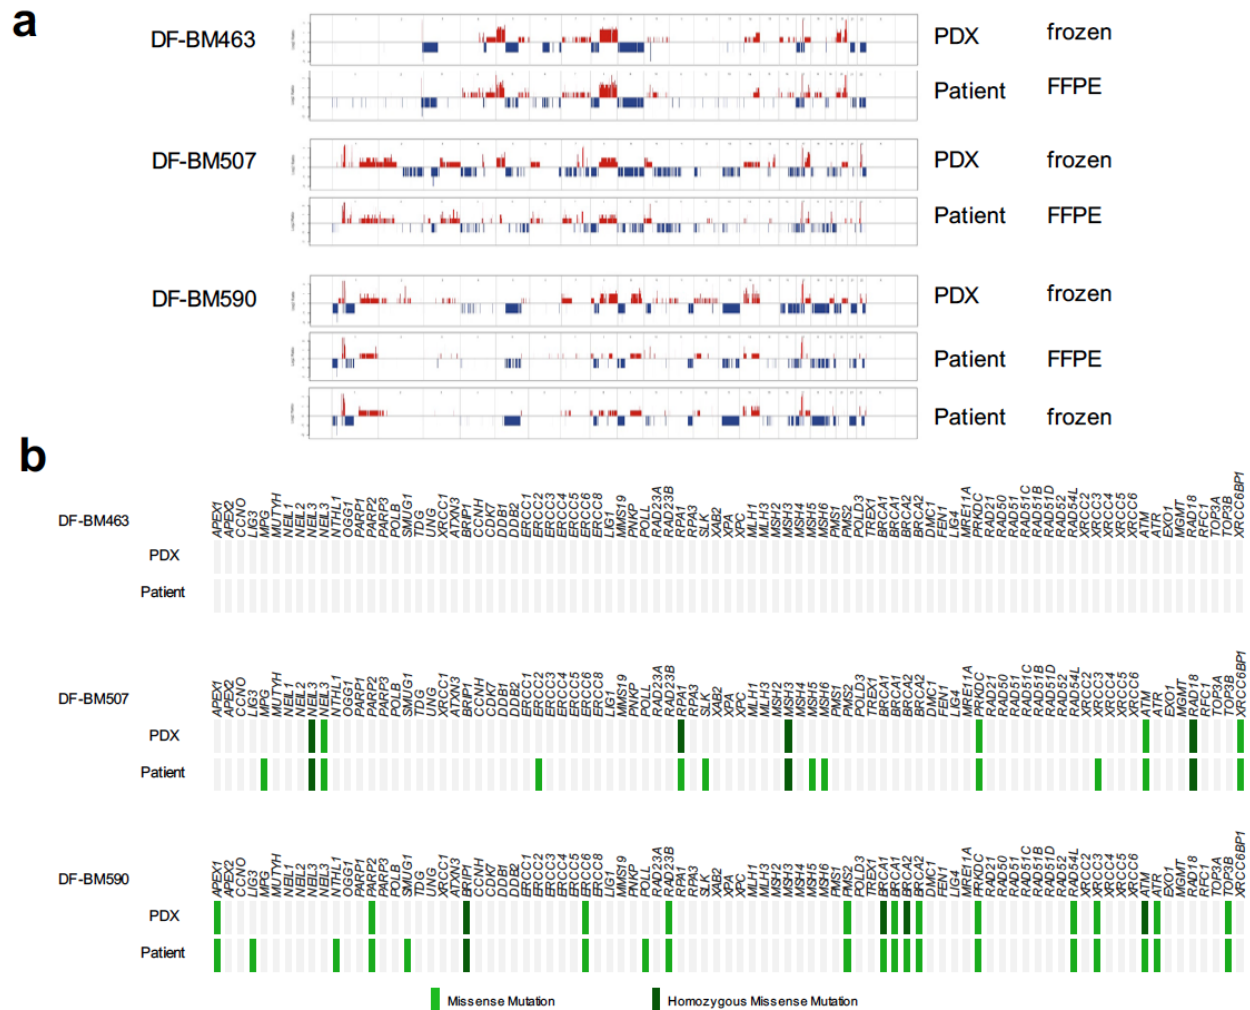

**Supplementary Figure 7: Conservation of genetic alternations after the transfer of tissue from patient to mouse. (a)** Patterns of genome-wide DNA copy number variations in DF-BM463, DF-BM507 and DF-BM590 PDXs and their matched patient tumors. **(b)** Mutational profiling of a panel of DNA repair genes in DF-BM463, DF-BM507 and DF-BM590 PDXs and their matched patient tumors.

**Supplementary Table 1: Summary of histological and immunophenotypic analysis of five  
HER2-positive BCBM PDX models**

| DF-BM# | HER2 | ER | PR | PTEN |
|--------|------|----|----|------|
| 354    | +++  | -  | -  | -    |
| 355    | +++  | +  | -  | -    |
| 463    | +++  | +  | -  | -    |
| 507    | +++  | -  | -  | -    |
| 590    | +++  | -  | -  | -    |

**Supplementary Table 2: The treatment histories of HER2-positive BCBM patients who contributed their specimens to the derivation of PDXs**

|          | Target therapy                          | Chemotherapy                                                                     | Hormone therapy | Radiation                                                         |
|----------|-----------------------------------------|----------------------------------------------------------------------------------|-----------------|-------------------------------------------------------------------|
| DF-BM354 | trastuzumab                             | vinorelbine                                                                      | none            | 2 separate episodes of stereotactic radiation to donor metastasis |
| DF-BM355 | trastuzumab                             | taxol,<br>capecitabine                                                           | none            | whole brain radiotherapy,<br>stereotactic radiation               |
| DF-BM463 | trastuzumab                             | doxorubicin,<br>cyclophosphamide,<br>paclitaxel                                  | tamoxifen       | none                                                              |
| DF-BM507 | trastuzumab,<br>lapatinib,<br>neratinib | doxorubicin,<br>cyclophosphamide,<br>paclitaxel,<br>vinorelbine,<br>capecitabine | none            | Whole Brain Radiotherapy                                          |
| DF-BM590 | trastuzumab,<br>lapatinib,<br>neratinib | doxorubicin,<br>cyclophosphamide,<br>paclitaxel,<br>carboplatin,<br>capecitabine | none            | Whole Brain Radiotherapy                                          |

**Supplementary Table 3: A list of mutations in DNA repair genes found in DF-BM507 and DF-BM590**

| sample   | gene                                            | locus           | type | ref | length | geno<br>type | covera<br>ge | allele_co<br>verage | transcript                                                        | location                           | function.                          | codon                | protein                                      | coding                                    | normal<br>izedAlt | cosmic              | blood_g<br>enotype | blood_c<br>overage | blood_all<br>ele_cover<br>age |
|----------|-------------------------------------------------|-----------------|------|-----|--------|--------------|--------------|---------------------|-------------------------------------------------------------------|------------------------------------|------------------------------------|----------------------|----------------------------------------------|-------------------------------------------|-------------------|---------------------|--------------------|--------------------|-------------------------------|
| DF-BM507 | ATM                                             | chr11:108175462 | SNV  | G   | 1      | G/A          | 99           | 68,31               | NM_000051.3                                                       | exonic                             | missense                           | AAT                  | p.Asp1853Asn                                 | c.5557G>A                                 | A                 | 41596               | G/G                | 44                 | 44,0                          |
| DF-BM507 | XRCC6BP1                                        | chr12:5835626   | SNV  | A   | 1      | A/T          | 64           | 36,28               | NM_033276.2                                                       | exonic                             | missense                           | TGC                  | p.Ser48Cys                                   | c.142A>T                                  | T                 | 431609              | A/A                | 86                 | 86,0                          |
| DF-BM507 | NEIL3                                           | chr4:178274835  | SNV  | A   | 1      | C/C          | 78           | 2,76                | NM_018248.2                                                       | exonic                             | missense                           | CAC                  | p.Gln471His                                  | c.1413A>C                                 | C                 | 1428751:<br>1131168 | A/A                | 85                 | 85,0                          |
| DF-BM507 | MSH3                                            | chr5:80168937   | SNV  | G   | 1      | A/A          | 26           | 0,26                | NM_002439.4                                                       | exonic                             | missense                           | ACA                  | p.Ala1045Thr                                 | c.3133G>A                                 | A                 |                     | G/G                | 91                 | 91,0                          |
| DF-BM507 | NEIL3                                           | chr4:178274750  | SNV  | C   | 1      | T/T          | 76           | 0,76                | NM_018248.2                                                       | exonic                             | missense                           | CTA                  | p.Pro443Leu                                  | c.1328C>T                                 | T                 |                     | C/C                | 93                 | 93,0                          |
| DF-BM507 | PRKDC                                           | chr8:48841708   | SNV  | G   | 1      | G/A          | 152          | 46,106              | NM_006904.6                                                       | exonic                             | missense                           | TCT                  | p.Pro695Ser                                  | c.2083C>T                                 | A                 |                     | /.                 | 13                 | 13,0                          |
| DF-BM507 | RAD18                                           | chr3:8955389    | SNV  | C   | 1      | T/T          | 70           | 0,70                | NM_020165.3                                                       | exonic                             | missense                           | CAA                  | p.Arg302Gln                                  | c.905G>A                                  | T                 |                     | /.                 | 6                  | 5,1                           |
| DF-BM507 | RPA1                                            | chr17:1782952   | SNV  | A   | 1      | G/G          | 72           | 0,72                | NM_002945.3                                                       | exonic                             | missense                           | GCA                  | p.Thr351Ala                                  | c.1051A>G                                 | G                 |                     | A/A                | 192                | 192,0                         |
| DF-BM590 | ATM                                             | chr11:108175462 | SNV  | G   | 1      | A/A          | 70           | 0,70                | NM_000051.3                                                       | exonic                             | missense                           | AAT                  | p.Asp1853Asn                                 | c.5557G>A                                 | A                 | 41596               | /.                 | 16                 | 16,0                          |
| DF-BM590 | BRCA1                                           | chr17:41244000  | SNV  | T   | 1      | C/C          | 80           | 4,76                | NM_007300.3                                                       | exonic                             | missense                           | AGA                  | p.Lys1183Arg                                 | c.3548A>G                                 | C                 | 148277              | T/T                | 63                 | 63,0                          |
| DF-BM590 | BRCA1                                           | chr17:41244936  | SNV  | G   | 1      | A/A          | 36           | 0,36                | NM_007300.3                                                       | exonic                             | missense                           | CTG                  | p.Pro871Leu                                  | c.2612C>T                                 | A                 | 148278              | /.                 | 18                 | 18,0                          |
| DF-BM590 | ATR                                             | chr3:142178144  | SNV  | C   | 1      | C/T          | 71           | 37,34               | NM_001184.3                                                       | exonic                             | missense                           | CAA                  | p.Arg2425Gln                                 | c.7274G>A                                 | T                 | 149485              | /.                 | 4                  | 4,0                           |
| DF-BM590 | PMS2                                            | chr7:6026942    | SNV  | G   | 1      | G/T          | 293          | 135,158             | NM_000535.5                                                       | exonic                             | missense                           | AAG                  | p.Thr485Lys                                  | c.1454C>A                                 | T                 | 150232              | G/G                | 83                 | 82,0                          |
| DF-BM590 | APEX1 TME<br>M55B                               | chr14:20925154  | SNV  | T   | 1      | T/G          | 158          | 83,75               | NM_001244249.1 <br>NM_001100814.2                                 | exonic do<br>wnstream              | missense                           | GAG                  | p.Asp148Glu                                  | c.444T>G                                  | G                 |                     | T/T                | 66                 | 66,0                          |
| DF-BM590 | BRCA1                                           | chr17:41223094  | SNV  | T   | 1      | C/C          | 81           | 6,75                | NM_007300.3                                                       | exonic                             | missense                           | GGT                  | p.Ser1634Gly                                 | c.4900A>G                                 | C                 |                     | T/T                | 29                 | 29,0                          |
| DF-BM590 | BRCA1                                           | chr17:41244435  | SNV  | T   | 1      | C/C          | 26           | 2,24                | NM_007300.3                                                       | exonic                             | missense                           | GGA                  | p.Glu1038Gly                                 | c.3113A>G                                 | C                 |                     | T/T                | 33                 | 33,0                          |
| DF-BM590 | BRCA2                                           | chr13:32906480  | SNV  | A   | 1      | C/C          | 73           | 2,71                | NM_000059.3                                                       | exonic                             | missense                           | CAT                  | p.Asn289His                                  | c.865A>C                                  | C                 |                     | A/A                | 81                 | 81,0                          |
| DF-BM590 | BRCA2                                           | chr13:32911463  | SNV  | A   | 1      | G/G          | 51           | 0,51                | NM_000059.3                                                       | exonic                             | missense                           | GAC                  | p.Asn991Asp                                  | c.2971A>G                                 | G                 |                     | A/A                | 79                 | 79,0                          |
| DF-BM590 | BRIP1                                           | chr17:59763347  | SNV  | A   | 1      | G/G          | 161          | 0,161               | NM_032043.2                                                       | exonic                             | missense                           | CCA                  | p.Ser919Pro                                  | c.2755T>C                                 | G                 |                     | A/A                | 44                 | 44,0                          |
| DF-BM590 | ERCC6                                           | chr10:50680422  | SNV  | C   | 1      | C/T          | 139          | 72,67               | NM_000124.3                                                       | exonic                             | missense                           | CAA                  | p.Arg975Gln                                  | c.2924G>A                                 | T                 |                     | /.                 | 24                 | 24,0                          |
| DF-BM590 | ERCC6 PGB<br>D3 ERCC6-<br>PGBD3 ERC<br>C6-PGBD3 | chr10:50732139  | SNV  | C   | 1      | C/T          | 41           | 18,23               | NM_000124.3 NM<br>_170753.3 NM_00<br>1277058.1 NM_00<br>1277059.1 | exonic utr_<br>5 exonic e<br>xonic | missense <br>missense <br>missense | GAT  <br>GAT <br>GAT | p.Gly446Asp  <br>p.Gly446Asp <br>p.Gly446Asp | c.1337G>A <br> c.1337G>A T <br> c.1337G>A | T T T             | C/C                 | 56                 | 57,0               |                               |
| DF-BM590 | PARP2                                           | chr14:20819232  | SNV  | G   | 1      | G/A          | 173          | 78,95               | NM_005484.3                                                       | exonic                             | missense                           | ATG                  | p.Val163Met                                  | c.487G>A                                  | A                 |                     | G/G                | 86                 | 86,0                          |
| DF-BM590 | PRKDC                                           | chr8:48710955   | SNV  | A   | 1      | A/G          | 353          | 124,229             | NM_006904.6                                                       | exonic                             | missense                           | ACT                  | p.Ile3433Thr                                 | c.10300T>C                                | G                 |                     | A/A                | 69                 | 69,0                          |
| DF-BM590 | RAD23B                                          | chr9:110084328  | SNV  | C   | 1      | C/T          | 393          | 78,315              | NM_002874.4                                                       | exonic                             | missense                           | GTT                  | p.Ala249Val                                  | c.746C>T                                  | T                 |                     | /.                 | 15                 | 15,0                          |
| DF-BM590 | RAD54L                                          | chr1:46725684   | SNV  | G   | 1      | G/A          | 88           | 61,27               | NM_001142548.1                                                    | exonic                             | missense                           | CAG                  | p.Arg107Gln                                  | c.320G>A                                  | A                 |                     | G/G                | 75                 | 76,0                          |
| DF-BM590 | TOP3B                                           | chr22:22318364  | SNV  | G   | 1      | G/A          | 99           | 41,58               | NM_003935.4                                                       | exonic                             | missense                           | TGG                  | p.Arg379Trp                                  | c.1135C>T                                 | A                 |                     | G/G                | 48                 | 48,0                          |
| DF-BM590 | XRCC3                                           | chr14:104169515 | SNV  | C   | 1      | C/A          | 301          | 156,145             | NM_001100118.1                                                    | exonic                             | missense                           | TAT                  | p.Asp186Tyr                                  | c.556G>T                                  | A                 |                     | C/C                | 110                | 111,0                         |

yellow highlight for COSMIC mutation

**Supplementary Table 4: A list of mutations in DNA repair genes found in patient brain metastatic tumors of DF-BM507 and DF-BM590**

| patient | gene                         | locus           | type | ref | length | geno | cover | allele_cov | transcript                                            | location                   | function.                  | codon           | protein                                         | coding                                  | normali | cosmic          | blood_gen | blood_c | blood_allele |
|---------|------------------------------|-----------------|------|-----|--------|------|-------|------------|-------------------------------------------------------|----------------------------|----------------------------|-----------------|-------------------------------------------------|-----------------------------------------|---------|-----------------|-----------|---------|--------------|
|         |                              |                 |      |     |        | type | age   | erage      |                                                       |                            |                            |                 |                                                 |                                         | zedAlt  |                 | type.1    | overage | _coverage    |
| MN507   | ATM                          | chr11:108175462 | SNV  | G   | 1      | G/A  | 140   | 97,43      | NM_000051.3                                           | exonic                     | missense                   | AAT             | p.Asp1853Asn                                    | c.5557G>A                               | A       | 41596           | G/G       | 44      | 44,0         |
| MN507   | XRCC6BP1                     | chr12:58335626  | SNV  | A   | 1      | A/T  | 494   | 350,144    | NM_033276.2                                           | exonic                     | missense                   | TGC             | p.Ser48Cys                                      | c.142A>T                                | T       | 431609          | A/A       | 85      | 85,0         |
| MN507   | NEIL3                        | chr4:178274835  | SNV  | A   | 1      | C/C  | 62    | 1,61       | NM_018248.2                                           | exonic                     | missense                   | CAC             | p.Gln471His                                     | c.1413A>C                               | C       | 1131168:1428751 | A/A       | 86      | 86,0         |
| MN507   | KLC3 ERCC2                   | chr19:45854919  | SNV  | T   | 1      | T/G  | 132   | 69,63      | NM_177417.2 NM_004000.3                               | downstream exonic          | missense                   | CAG             | p.Lys751Gln                                     | c.2251A>C                               | G       |                 | T/T       | 93      | 92,0         |
| MN507   | MPG NPLR3                    | chr16:135414    | SNV  | G   | 1      | G/A  | 130   | 60,70      | NM_001015052.2 NM_001077350.2                         | exonic downstream          | missense                   | ATC             | p.Val174Ile                                     | c.520G>A                                | A       |                 | G/G       | 47      | 47,0         |
| MN507   | MSH3                         | chr5:80168937   | SNV  | G   | 1      | A/A  | 87    | 1,86       | NM_002439.4                                           | exonic                     | missense                   | ACA             | p.Ala1045Thr                                    | c.3133G>A                               | A       |                 | G/G       | 93      | 93,0         |
| MN507   | MSH5 MSH5-SAPCD1             | chr6:31708328   | SNV  | C   | 1      | C/T  | 58    | 19,39      | NM_172165.3 NR_037846.1                               | exonic exon c_nc           | missense                   | TCA             | p.Pro295Ser                                     | c.85C>T                                 | T       |                 | C/C       | 27      | 27,0         |
| MN507   | MSH6                         | chr2:48026045   | SNV  | G   | 1      | G/A  | 166   | 144,22     | NM_000179.2                                           | exonic                     | missense                   | GAC             | p.Gly308Asp                                     | c.923G>A                                | A       |                 | G/G       | 106     | 106,0        |
| MN507   | NEIL3                        | chr4:178262784  | SNV  | A   | 1      | A/G  | 138   | 101,37     | NM_018248.2                                           | exonic                     | missense                   | CGT             | p.His286Arg                                     | c.857A>G                                | G       |                 | A/A       | 100     | 101,0        |
| MN507   | NEIL3                        | chr4:178274750  | SNV  | C   | 1      | T/T  | 73    | 1,72       | NM_018248.2                                           | exonic                     | missense                   | CTA             | p.Pro443Leu                                     | c.1328C>T                               | T       |                 | C/C       | 93      | 93,0         |
| MN507   | PRKDC                        | chr8:48841708   | SNV  | G   | 1      | G/A  | 174   | 31,143     | NM_006904.6                                           | exonic                     | missense                   | TCT             | p.Pro695Ser                                     | c.2083C>T                               | A       |                 | /.        | 13      | 13,0         |
| MN507   | RAD18                        | chr3:8955389    | SNV  | C   | 1      | T/T  | 34    | 1,33       | NM_020165.3                                           | exonic                     | missense                   | CAA             | p.Arg302Gln                                     | c.905G>A                                | T       |                 | /.        | 6       | 5,1          |
| MN507   | RPA1                         | chr17:1782952   | SNV  | A   | 1      | A/G  | 146   | 27,119     | NM_002945.3                                           | exonic                     | missense                   | GCA             | p.Thr351Ala                                     | c.1051A>G                               | G       |                 | A/A       | 190     | 190,0        |
| MN507   | SLK                          | chr10:105762591 | SNV  | G   | 1      | G/A  | 69    | 45,24      | NM_014720.2                                           | exonic                     | missense                   | TAT             | p.Cys552Tyr                                     | c.1655G>A                               | A       |                 | /.        | 23      | 23,0         |
| MN507   | SLK                          | chr10:105762909 | SNV  | C   | 1      | C/G  | 95    | 58,37      | NM_014720.2                                           | exonic                     | missense                   | GGT             | p.Ala658Gly                                     | c.1973C>G                               | G       |                 | /.        | 11      | 11,0         |
| MN507   | XRCC3                        | chr14:104169599 | SNV  | G   | 1      | G/A  | 177   | 156,21     | NM_001100118.1                                        | exonic                     | nonsense                   | TAG             | p.Gln158Ter                                     | c.472C>T                                | A       |                 | G/G       | 279     | 279,0        |
| MN590   | ATM                          | chr11:108175462 | SNV  | G   | 1      | G/A  | 83    | 12,71      | NM_000051.3                                           | exonic                     | missense                   | AAT             | p.Asp1853Asn                                    | c.5557G>A                               | A       | 41596           | /.        | 17      | 17,0         |
| MN590   | BRCA1                        | chr17:41244000  | SNV  | T   | 1      | T/C  | 94    | 10,84      | NM_007300.3                                           | exonic                     | missense                   | AGA             | p.Lys1183Arg                                    | c.3548A>G                               | C       | 148277          | T/T       | 63      | 63,0         |
| MN590   | BRCA1                        | chr17:41244936  | SNV  | G   | 1      | A/A  | 80    | 3,77       | NM_007300.3                                           | exonic                     | missense                   | CTG             | p.Pro871Leu                                     | c.2612C>T                               | A       | 148278          | /.        | 18      | 18,0         |
| MN590   | ATR                          | chr3:142178144  | SNV  | C   | 1      | C/T  | 84    | 40,44      | NM_001184.3                                           | exonic                     | missense                   | CAA             | p.Arg2425Gln                                    | c.7274G>A                               | T       | 149485          | /.        | 4       | 4,0          |
| MN590   | PMS2                         | chr7:6026942    | SNV  | G   | 1      | G/T  | 299   | 139,160    | NM_000535.5                                           | exonic                     | missense                   | AAG             | p.Thr485Lys                                     | c.1454C>A                               | T       | 150232          | G/G       | 78      | 79,0         |
| MN590   | APEX1 TME55B                 | chr14:20925154  | SNV  | T   | 1      | T/G  | 238   | 95,143     | NM_001244249.1 NM_001100814.2                         | exonic downstream          | missense                   | GAG             | p.Asp148Glu                                     | c.444T>G                                | G       |                 | T/T       | 65      | 65,0         |
| MN590   | BRCA1                        | chr17:41223094  | SNV  | T   | 1      | T/C  | 134   | 50,84      | NM_007300.3                                           | exonic                     | missense                   | GGT             | p.Ser1634Gly                                    | c.4900A>G                               | C       |                 | T/T       | 30      | 30,0         |
| MN590   | BRCA1                        | chr17:41244435  | SNV  | T   | 1      | T/C  | 87    | 19,68      | NM_007300.3                                           | exonic                     | missense                   | GGA             | p.Glu1038Gly                                    | c.3113A>G                               | C       |                 | T/T       | 34      | 34,0         |
| MN590   | BRCA2                        | chr13:32906480  | SNV  | A   | 1      | A/C  | 52    | 6,46       | NM_000059.3                                           | exonic                     | missense                   | CAT             | p.Asn289His                                     | c.865A>C                                | C       |                 | A/A       | 87      | 87,0         |
| MN590   | BRCA2                        | chr13:32911463  | SNV  | A   | 1      | A/G  | 72    | 15,57      | NM_000059.3                                           | exonic                     | missense                   | GAC             | p.Asn991Asp                                     | c.2971A>G                               | G       |                 | A/A       | 76      | 76,0         |
| MN590   | BRIP1                        | chr17:59763347  | SNV  | A   | 1      | G/G  | 113   | 0,113      | NM_032043.2                                           | exonic                     | missense                   | CCA             | p.Ser919Pro                                     | c.2755T>C                               | G       |                 | A/A       | 46      | 46,0         |
| MN590   | ERCC6 PGBD3 PGBD3 ERC6-PGBD3 | chr10:50680422  | SNV  | C   | 1      | C/T  | 170   | 84,86      | NM_000124.3 NM_000124.3 NM_001277058.1 NM_001277059.1 | exonic utr_5 exonic exonic | missense missense missense | GAT GAT GAT GAT | p.Gly446Asp p.Gly446Asp p.Gly446Asp p.Gly446Asp | c.1337G>A c.1337G>A c.1337G>A c.1337G>A | T T T T |                 | C/C       | 55      | 57,0         |
| MN590   | UG3                          | chr17:33329109  | SNV  | C   | 1      | C/T  | 104   | 72,32      | NM_013975.3                                           | exonic                     | missense                   | TTC             | p.Ser887Phe                                     | c.2660C>T                               | T       |                 | C/C       | 65      | 65,0         |
| MN590   | NTHL1                        | chr16:2094653   | SNV  | A   | 1      | A/G  | 53    | 26,25      | NM_002528.5                                           | exonic                     | missense                   | ACC             | p.Ile176Thr                                     | c.527T>C                                | G       |                 | A/A       | 60      | 60,0         |
| MN590   | PARP2                        | chr14:20819232  | SNV  | G   | 1      | G/A  | 121   | 35,86      | NM_005484.3                                           | exonic                     | missense                   | ATG             | p.Val163Met                                     | c.487G>A                                | A       |                 | G/G       | 91      | 91,0         |
| MN590   | POLL                         | chr10:103344589 | SNV  | T   | 1      | T/G  | 204   | 106,98     | NM_001174084.1                                        | exonic                     | missense                   | CCC             | p.Thr221Pro                                     | c.661A>C                                | G       |                 | T/T       | 117     | 117,0        |
| MN590   | PRKDC                        | chr8:48710955   | SNV  | A   | 1      | A/G  | 109   | 65,44      | NM_006904.6                                           | exonic                     | missense                   | ACT             | p.Ile3433Thr                                    | c.10300T>C                              | G       |                 | A/A       | 72      | 72,0         |
| MN590   | RAD23B                       | chr9:110084328  | SNV  | C   | 1      | C/T  | 340   | 68,272     | NM_002874.4                                           | exonic                     | missense                   | GTT             | p.Ala249Val                                     | c.746C>T                                | T       |                 | /.        | 15      | 15,0         |
| MN590   | RAD54L                       | chr1:46725684   | SNV  | G   | 1      | G/A  | 134   | 70,64      | NM_001142548.1                                        | exonic                     | missense                   | CAG             | p.Arg107Gln                                     | c.320G>A                                | A       |                 | G/G       | 76      | 76,0         |
| MN590   | SMUG1                        | chr12:54577720  | SNV  | G   | 1      | G/A  | 146   | 122,24     | NM_001243788.1                                        | exonic                     | missense                   | CTC             | p.Pro2Leu                                       | c.5C>T                                  | A       |                 | G/G       | 72      | 72,0         |
| MN590   | TOP3B                        | chr22:22318364  | SNV  | G   | 1      | G/A  | 141   | 62,79      | NM_003935.4                                           | exonic                     | missense                   | TGG             | p.Arg379Trp                                     | c.1135C>T                               | A       |                 | G/G       | 52      | 52,0         |
| MN590   | XRCC3                        | chr14:104169515 | SNV  | C   | 1      | C/A  | 270   | 189,81     | NM_001100118.1                                        | exonic                     | missense                   | TAT             | p.Asp186Tyr                                     | c.556G>T                                | A       |                 | C/C       | 119     | 120,0        |

## **Supplementary methods**

### ***In vivo treatment***

JQ1 (James Bradner, DFCI/Harvard) was dissolved in DMSO and then diluted with 10% cyclodextran. JQ1 was given at a final dose of 100 mg/kg body weight by i.p. injection once/day. MEK162 was formulated in 1% carboxymethyl cellulose with 0.5% Tween80 and daily delivered orally to mice at 15 mg/kg.

### **Western blot**

Tumor samples were lysed and western blot analysis was performed as previously described<sup>1</sup>. Antibodies against pAKT (S473) (Cell Signaling #4060), AKT (Cell Signaling #9272), HER2 (Calbiochem#OP15), EGFR (Cell Signaling #4267), p110 $\alpha$  (Cell Signaling #4249), p110 $\beta$  (Cell Signaling #3011), pMAPK (Cell Signaling #9101), MAPK (Cell Signaling #9102), pS6RP (Cell Signaling #2211), S6RP (Cell Signaling #2217), Vinculin (Sigma#V9131), and  $\alpha$ -Tubulin (Sigma#T9026) were applied. Antibody validation is provided by the manufacturers' website.

## **Reference**

1. Ni, J., *et al.* Functional characterization of an isoform-selective inhibitor of PI3K-p110beta as a potential anticancer agent. *Cancer discovery* **2**, 425-433 (2012).
